# Supplementary material
Source: Springer Nature journal article supplement (https://www.springermedizin.de/resource/supplementary/13054_2010_8346_MOESM2_ESM.pdf/9731760)
Supplement: MOESM2 [file 9731760]

### All Patients

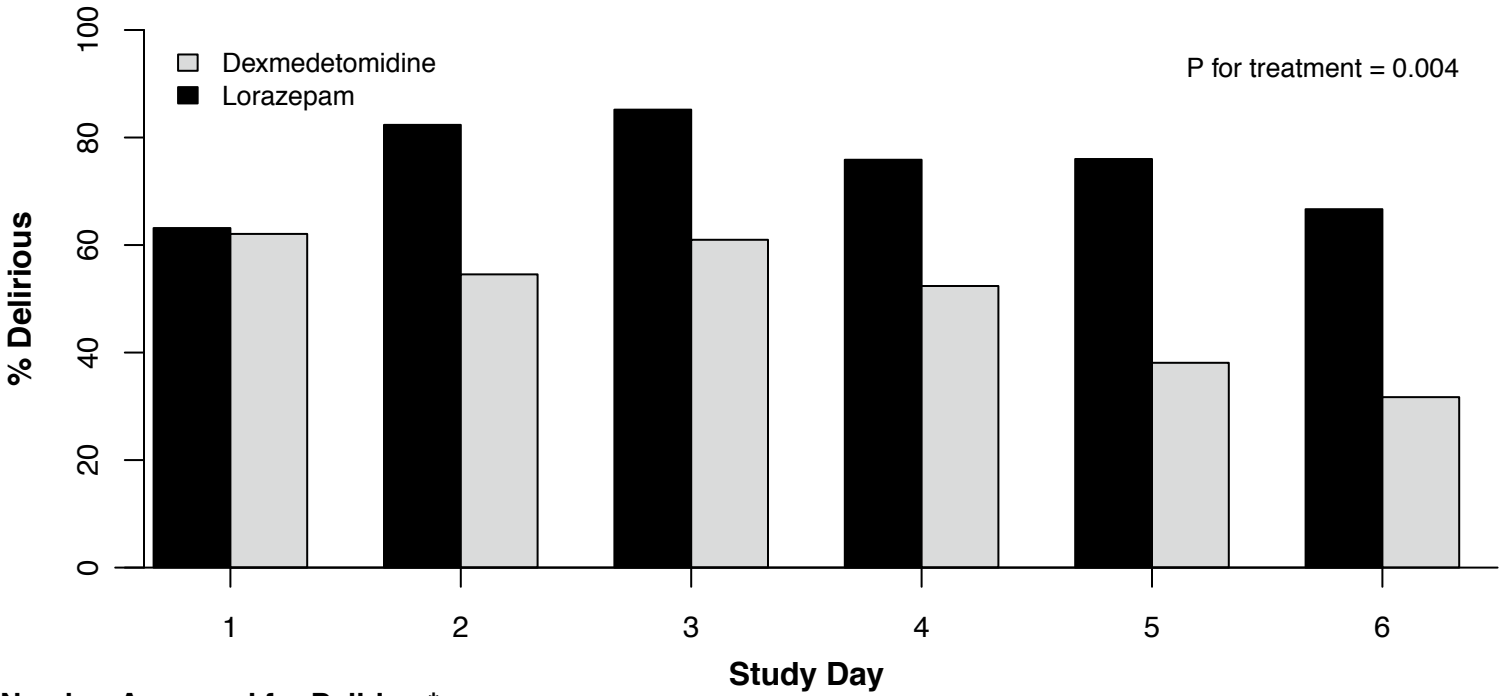

#### Number Assessed for Delirium\*

|     |    |    |    |    |    |    |
|-----|----|----|----|----|----|----|
| DEX | 29 | 33 | 41 | 42 | 42 | 41 |
| LZ  | 19 | 17 | 27 | 29 | 25 | 27 |

### Septic Patients

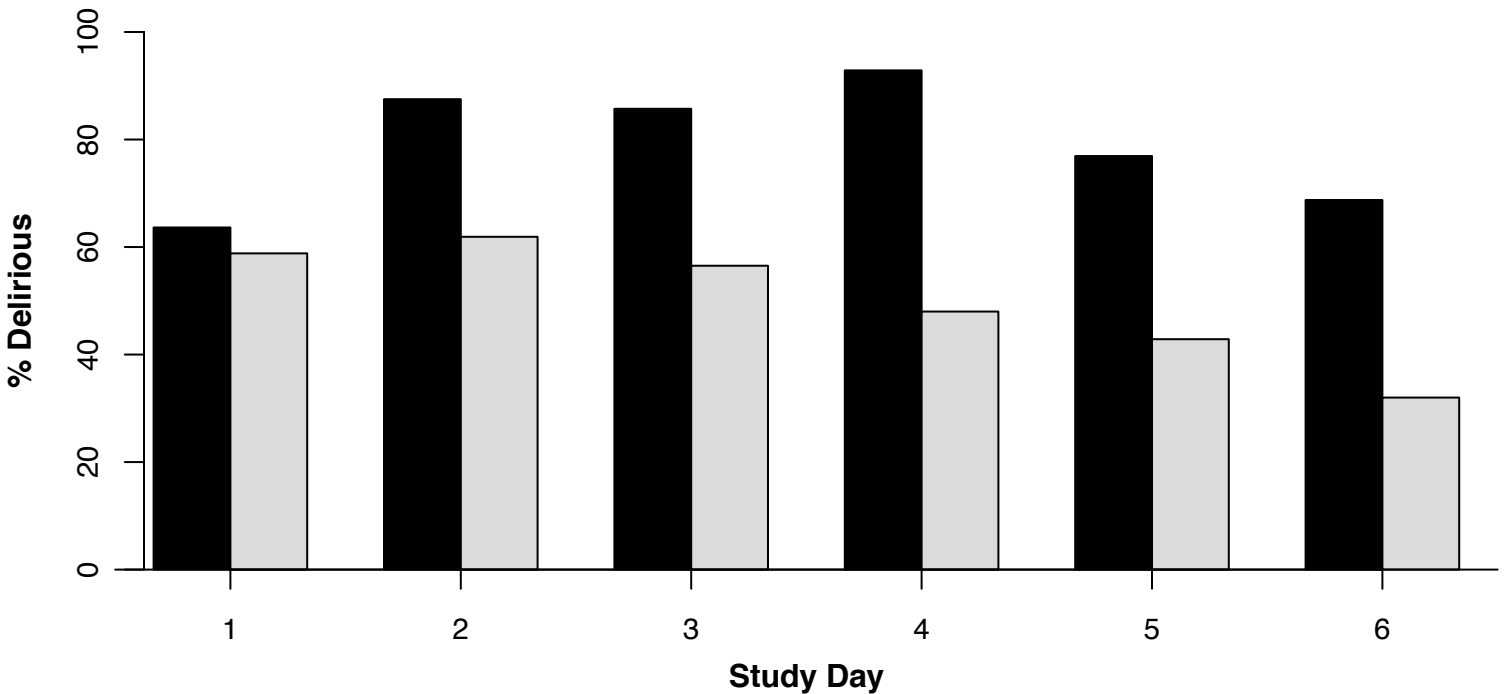

#### Number Assessed for Delirium\*

|     |    |    |    |    |    |    |
|-----|----|----|----|----|----|----|
| DEX | 17 | 21 | 23 | 25 | 28 | 25 |
| LZ  | 11 | 8  | 14 | 14 | 13 | 16 |
